# Supplementary material for: Molecular Identification and Genetic Characterization of Macrophomina phaseolina Strains Causing Pathogenicity on Sunflower and Chickpea
Source: PubMed Central journal article supplement (PMC5515817; doi:10.3389/fmicb.2017.01309), 2017-07-19
Supplement: Image_1.pdf [file Image_1.pdf]

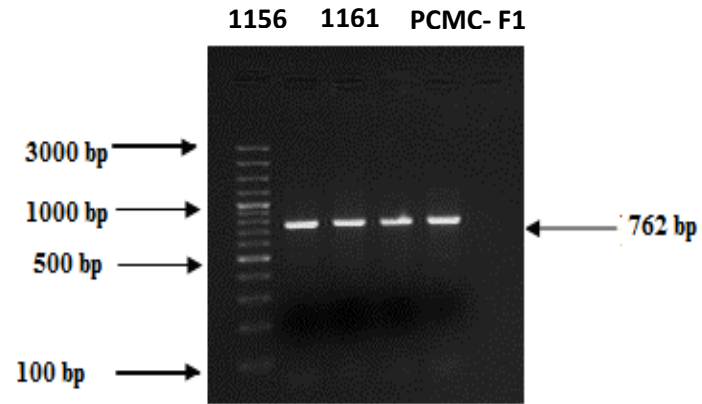

**Figure S1: Amplification of 18S rRNA from the *M. phaseolina* strains.**
