# Supplementary material for: Molecular Identification and Genetic Characterization of Macrophomina phaseolina Strains Causing Pathogenicity on Sunflower and Chickpea
Source: PubMed Central journal article supplement (PMC5515817; doi:10.3389/fmicb.2017.01309), 2017-07-19
Supplement: Image_2.pdf [file Image_2.pdf]

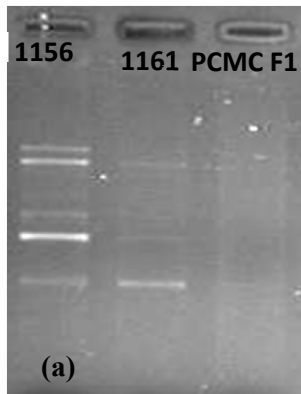

(a) OPA-1

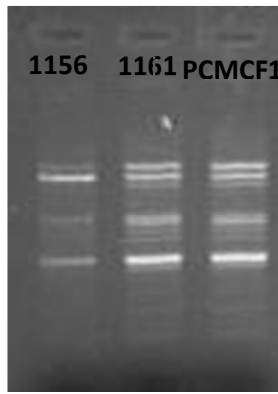

(b) OPA-2

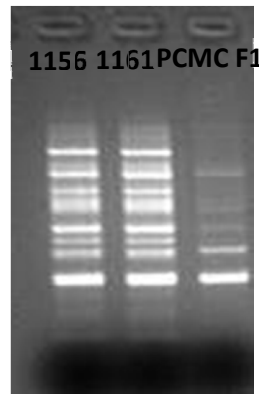

(c) OPA-3

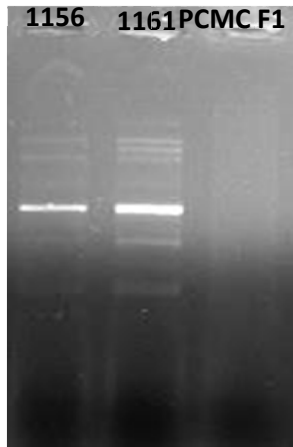

(d) OPA-4

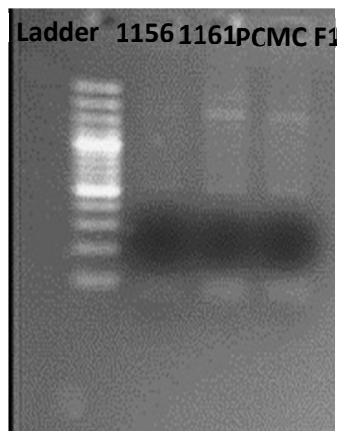

(e) OPA-7

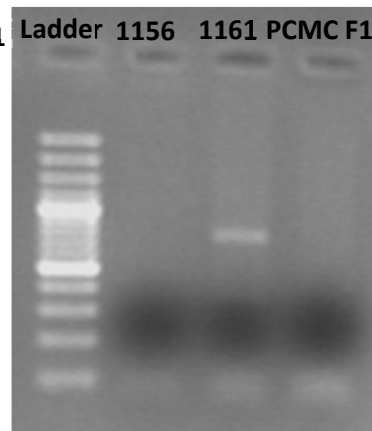

(f) OPA-10

Figure S.2. PCR Profile of *M. phaseolina* strains amplified with RAPD primers

a-f: PCR amplification with different primers
