# Supplementary material for: Molecular Identification and Genetic Characterization of Macrophomina phaseolina Strains Causing Pathogenicity on Sunflower and Chickpea
Source: PubMed Central journal article supplement (PMC5515817; doi:10.3389/fmicb.2017.01309), 2017-07-19
Supplement: Image_3.pdf [file Image_3.pdf]

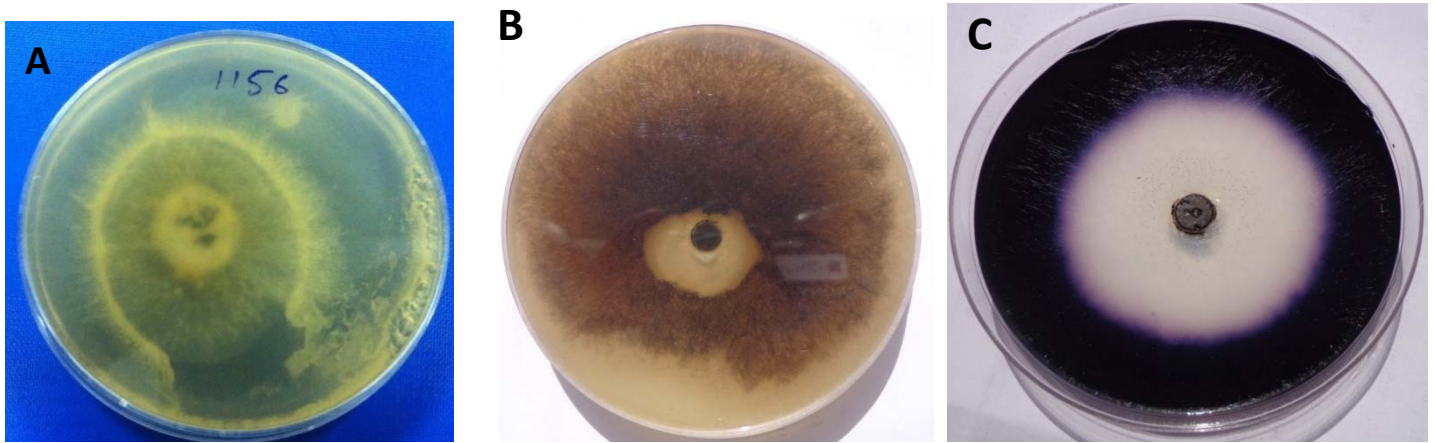

**Figure S3. Production of hydrolytic enzymes by *M. phaseolina* strains.**

- (A) Protease production on skim milk agar by *M. phaseolina* strain 1160. The zone was detected by observing transparent area appeared after degradation of casein.**
- (B) Lipase production on rhodamine B agar by *M. phaseolina* strain PCMC-F1. The production zone was observed on the basis of yellow-orange colour appeared under UV light.**
- (C) Amylase production on soluble starch by *M. phaseolina* strain 1156. The production zone was detected by spreading 1% lugol solution on the plate.**
