# Supplementary material for: Molecular Identification and Genetic Characterization of Macrophomina phaseolina Strains Causing Pathogenicity on Sunflower and Chickpea
Source: PubMed Central journal article supplement (PMC5515817; doi:10.3389/fmicb.2017.01309), 2017-07-19
Supplement: Table_1.pdf [file Table_1.pdf]

**Table S1. Sequences of the primers**

| <b>Primers</b> | <b>Sequence</b> |
|----------------|-----------------|
| OPA-01         | CAGGCCCTTC      |
| OPA-02         | TGCCGAGCTG      |
| OPA-03         | AGTCAGCCAC      |
| OPA-04         | AATCGGGCTG      |
| OPA-07         | GAAACGGGTG      |
| OPA-10         | GTGATCGCAG      |
